# Supplementary material for: Metastatic Cancer Expression Generator (MetGen): A Generative Contrastive Learning Framework for Metastatic Cancer Generation
Source: Preprints.org preprint supplement (doi:10.20944/preprints202404.0397.v1), 2024-04-05

Supplementary Fig.1 Structure of MetGen


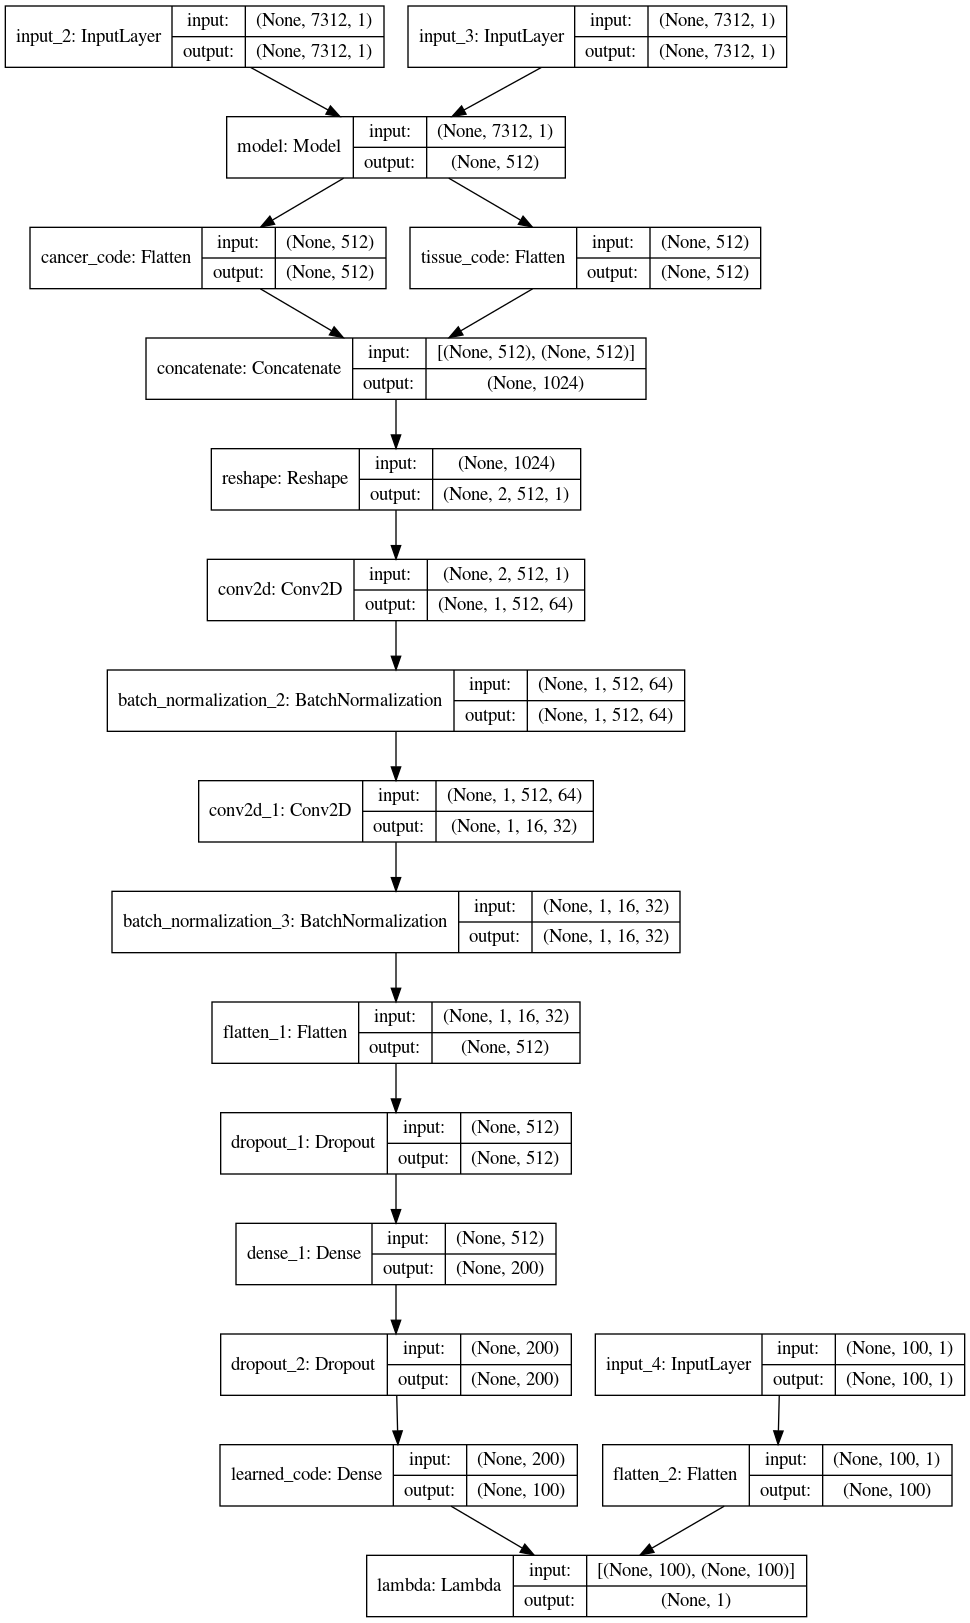


Supplementary Fig.2 Structure of MetVAE


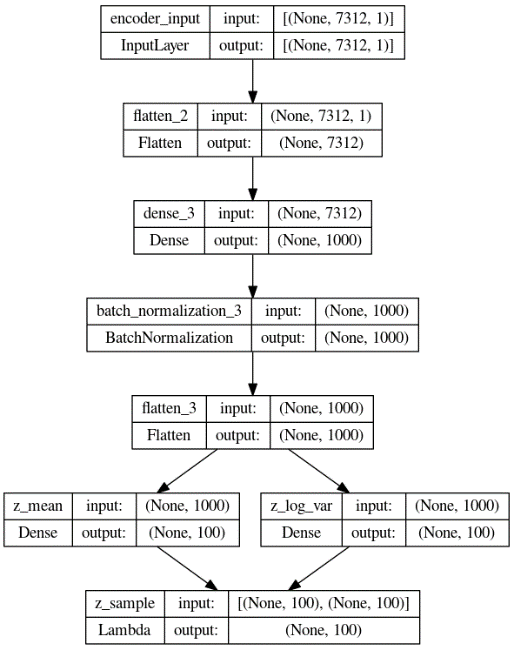

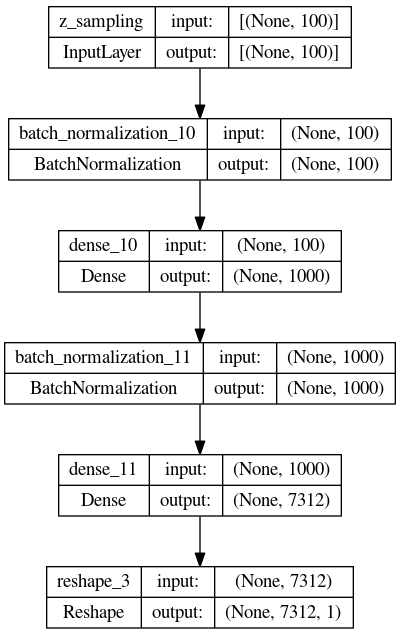


Supplementary Fig.3 Primary tumor distribution


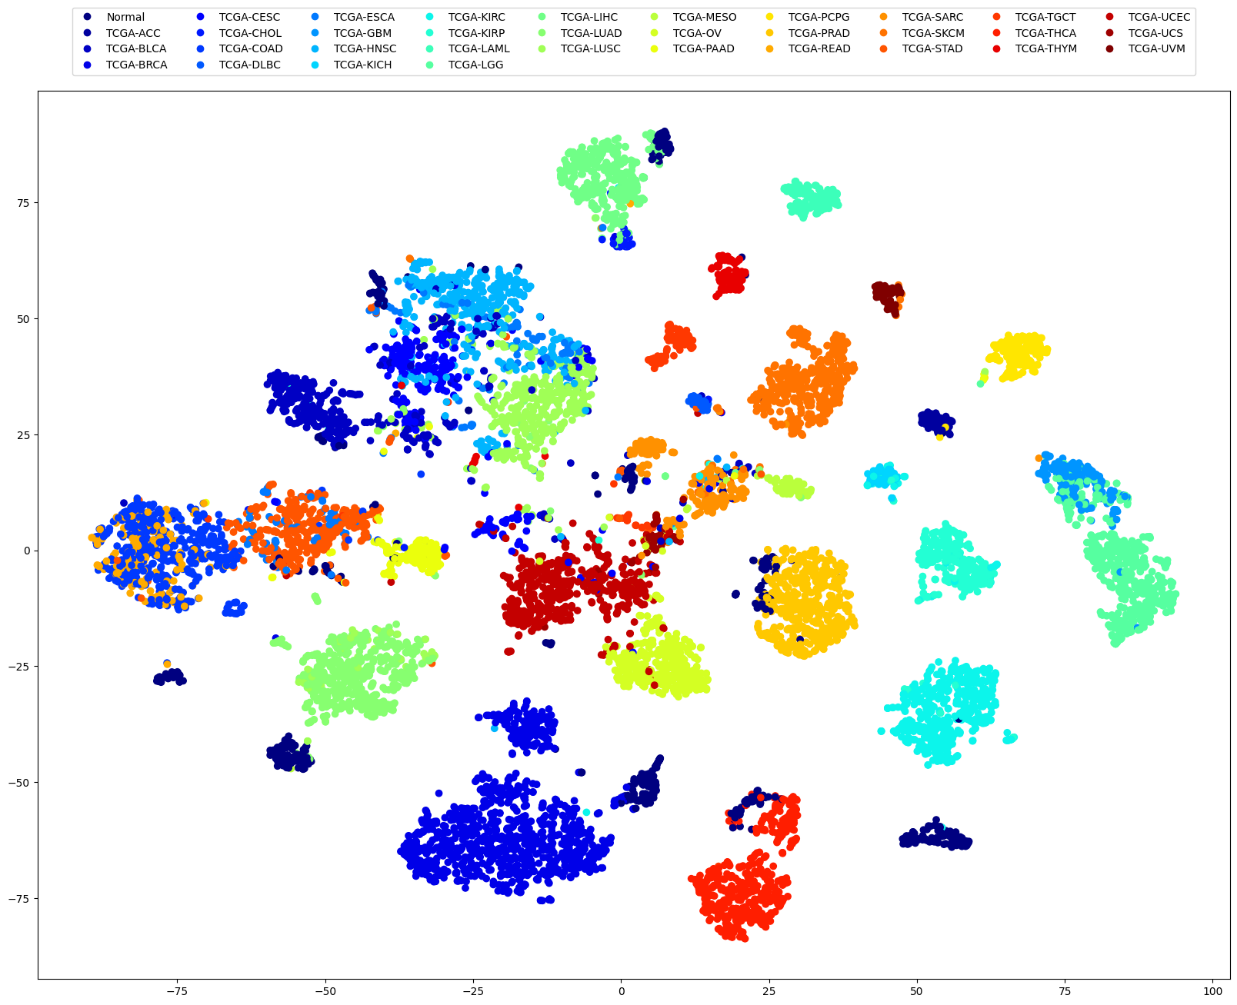

Supplement: Supplementary file 1 [file supplementary]
